# Supplementary material for: Impaired fibrinolysis and increased clot strength are potential risk factors for thrombosis in lymphoma
Source: PubMed Central journal article supplement — Blood Adv. 2023 Sep 29;7(22):7056–66. doi: 10.1182/bloodadvances.2023011379 (PMC10694522; doi:10.1182/bloodadvances.2023011379), 2023-09-29

*Supplementary table 1: Blood test results and fibrinolysis markers at diagnosis and follow-up for five patients with acute myeloid leukemia and one patient with advanced myelodysplastic syndrome.*

|                                                       | At diagnosis      | At follow-up       | P-value | Reference range |
|-------------------------------------------------------|-------------------|--------------------|---------|-----------------|
| <b>Standard blood tests</b>                           |                   |                    |         |                 |
| B-Hemoglobin, mmol/L mean (95% CI)                    | 6.4 (4.9-7.8)     | 6 (4.3-7.8)        | 0.62    | 7.3-10.5        |
| B-Platelet count, 10 <sup>9</sup> /L mean (95% CI)    | 62 (-6-129)       | 115 (-155-385)     | 0.63    | 145-400         |
| B-Leucocyte count, 10 <sup>9</sup> /L median (95% CI) | 3.4 (0.4-31)      | 2.5 (0.7-8.8)      | 0.77    | 3.5-10          |
| P-Creatinine, μmol/L median (95% CI)                  | 78 (60-101)       | 74 (46-118)        | 0.54    | 45-105          |
| P-C-reactive protein, mg/L median (IQR)               | 4 (17.2)          | 6 (5.3)            | 0.74    | <8              |
| <b>Coagulation tests</b>                              |                   |                    |         |                 |
| P-INR, median (IQR)                                   | 1 (0)             | 1 (0)              | 0.32    | <1.2            |
| P-APTT, seconds median (IQR)                          | 22.5 (1.2)        | 22 (1)             | 0.44    | 20-29           |
| P-D-dimer, mg/L median (IQR)                          | 7.75 (10.9)       | 0.9 (2)            | 0.15    | <0.5            |
| P-Fibrinogen, μmol/L mean (95% CI)                    | 9.45 (2.43-16.47) | 11.97 (6.68-17.27) | 0.33    | 5.5-12.0        |
| <b>Fibrinolysis markers</b>                           |                   |                    |         |                 |
| P-α2AP activity, % mean (95% CI)                      | 90 (39-141)       | 131 (102-160)      | 0.09    | 75-135          |
| P-PAI-1, ng/mL median (95% CI)                        | 5 (0-142)         | 7 (3-18)           | 0.83    | 7-43            |
| P-PAP, ng/mL median (95% CI)                          | 2228 (307-16182)  | 411 (122-1386)     | 0.12    | 0-514           |
| P-PLG activity, % mean (95% CI)                       | 105 (71-140)      | 121 (93-149)       | 0.11    | 70-130          |
| P-tPA, ng/mL median (95% CI)                          | 3 (2-6)           | 3 (2-5)            | 0.78    | 2-8             |
| P-uPA, ng/mL median (95% CI)                          | 0.8 (0.5-1.4)     | 0.8 (0.5-1.1)      | 0.64    | 1.2-2.4         |
| <b>Clot lysis assay</b>                               |                   |                    |         |                 |
| Lag time, seconds median (IQR)                        | 938 (188)         | 711 (114)          | 0.12    |                 |
| Peak absorbance, AU mean (95% CI)                     | 0.55 (0.14-0.96)  | 0.73 (0.25-1.22)   | 0.55    | 0.18-0.74       |
| 50% lysis time, seconds median (95% CI)               | 497 (224-1100)    | 902 (420-1936)     | 0.14    | 309-1565        |
| Area under the curve, median (95% CI)                 | 498 (308-807)     | 887 (323-2433)     | 0.15    | 219-1051        |

B-: Blood, P-: Plasma, CI: Confidence interval, IQR: Interquartile range, INR: International normalized ratio, APTT: Activated partial thromboplastin time, PAI-1: Plasminogen activator inhibitor-1, PLG: Plasminogen, tPA: Tissue type plasminogen activator, uPA: urokinase type plasminogen activator, AUC: Area under the curve.

*Supplementary table 2: Blood test results and fibrinolysis markers at diagnosis and follow-up for 39 patients with lymphoma.*

|                                                       | At diagnosis        | At follow-up       | P-value | Reference range |
|-------------------------------------------------------|---------------------|--------------------|---------|-----------------|
| <b>Standard blood tests</b>                           |                     |                    |         |                 |
| B-Hemoglobin, mmol/L mean (95% CI)                    | 7.9 (7.5-8.3)       | 7.4 (6.8-8.1)      | 0.47    | 7.3-10.5        |
| B-Platelet count, 10 <sup>9</sup> /L mean (95% CI)    | 297 (257-337)       | 239 (194-284)      | 0.06    | 145-400         |
| B-Leucocyte count, 10 <sup>9</sup> /L median (95% CI) | 9.4 (7.8-11.3)      | 4.8 (3.7-6.1)      | 0.003   | 3.5-10          |
| P-Creatinine, µmol/L median (95% CI)                  | 71 (66-76)          | 73 (67-81)         | 0.79    | 45-105          |
| P-C-reactive protein, mg/L median (IQR)               | 6 (10.9)            | 4 (3.2)            | 0.10    | <8              |
| <b>Coagulation tests</b>                              |                     |                    |         |                 |
| P-INR, median (IQR)                                   | 1 (0.1)             | 1 (0.1)            | 0.58    | <1.2            |
| P-APTT, seconds median (IQR)                          | 23 (5)              | 25 (4.8)           | 0.19    | 20-29           |
| P-D-dimer, mg/L median (IQR)                          | 0.56 (0.8)          | 0.43 (0.4)         | 0.01    | <0.5            |
| P-Fibrinogen, µmol/L mean (95% CI)                    | 11.54 (10.24-12.85) | 10.47 (9.45-11.49) | 0.29    | 5.5-12.0        |
| <b>Fibrinolysis markers</b>                           |                     |                    |         |                 |
| P-α2AP activity, % mean (95% CI)                      | 125 (120-130)       | 121 (116-127)      | 0.31    | 75-135          |
| P-PAI-1, ng/mL median (95% CI)                        | 7 (5-10)            | 9 (6-14)           | 0.23    | 7-43            |
| P-PAP, ng/mL median (95% CI)                          | 316 (259-384)       | 223 (166-301)      | 0.04    | 0-514           |
| P-PLG activity, % mean (95% CI)                       | 113 (107-119)       | 107 (99-114)       | 0.12    | 70-130          |
| P-tPA, ng/mL median (95% CI)                          | 3 (2-3)             | 3 (2-4)            | 0.37    | 2-8             |
| P-uPA, ng/mL median (95% CI)                          | 0.6 (0.5-0.6)       | 0.7 (0.6-0.8)      | 0.02    | 1.2-2.4         |
| <b>Clot lysis assay</b>                               |                     |                    |         |                 |
| Lag time, seconds median (IQR)                        | 720 (253)           | 582 (120)          | 0.05    |                 |
| Peak absorbance, AU mean (95% CI)                     | 0.68 (0.6-0.76)     | 0.69 (0.6-0.78)    | 0.86    | 0.18-0.74       |
| 50% lysis time, seconds median (95% CI)               | 786 (660-936)       | 854 (712-1025)     | 0.41    | 309-1565        |
| Area under the curve, median (95% CI)                 | 764 (606-963)       | 808 (631-1034)     | 0.26    | 219-1051        |

B-: Blood, P-: Plasma, CI: Confidence interval, IQR: Interquartile range, INR: International normalized ratio, APTT: Activated partial thromboplastin time, PAI-1: Plasminogen activator inhibitor-1, PLG: Plasminogen, tPA: Tissue type plasminogen activator, uPA: urokinase type plasminogen activator, AUC: Area under the curve.

*Supplementary Table 3: Blood test results and fibrinolysis markers at diagnosis and follow-up for 14 patients with multiple myeloma and one patient with AL amyloidosis.*

|                                                       | At diagnosis      | At follow-up      | P-value | Reference range |
|-------------------------------------------------------|-------------------|-------------------|---------|-----------------|
| <b>Standard blood tests</b>                           |                   |                   |         |                 |
| B-Hemoglobin, mmol/L mean (95% CI)                    | 6.8 (6.1-7.5)     | 6.9 (6.1-7.7)     | 0.84    | 7.3-10.5        |
| B-Platelet count, 10 <sup>9</sup> /L mean (95% CI)    | 209 (163-255)     | 245 (155-334)     | 0.35    | 145-400         |
| B-Leucocyte count, 10 <sup>9</sup> /L median (95% CI) | 4.9 (4.2-5.6)     | 5.2 (3.7-7.4)     | 0.94    | 3.5-10          |
| P-Creatinine, μmol/L median (95% CI)                  | 75 (62-90)        | 75 (59-95)        | 0.70    | 45-105          |
| P-C-reactive protein, mg/L median (IQR)               | 4 (6.3)           | 4 (0.6)           | 0.37    | <8              |
| <b>Coagulation tests</b>                              |                   |                   |         |                 |
| P-INR, median (IQR)                                   | 1 (0.2)           | 1 (0)             | 0.44    | <1.2            |
| P-APTT, seconds median (IQR)                          | 25 (9)            | 26 (12)           | 0.31    | 20-29           |
| P-D-dimer, mg/L median (IQR)                          | 0.56 (1.7)        | 0.41 (2.5)        | 0.82    | <0.5            |
| P-Fibrinogen, μmol/L mean (95% CI)                    | 9.56 (7.92-11.21) | 11.8 (9.11-14.49) | 0.01    | 5.5-12.0        |
| <b>Fibrinolysis markers</b>                           |                   |                   |         |                 |
| P-α2AP activity, % mean (95% CI)                      | 99 (87-112)       | 142 (94-191)      | 0.01    | 75-135          |
| P-PAI-1, ng/mL median (95% CI)                        | 7 (3-16)          | 12 (5-28)         | 0.03    | 7-43            |
| P-PAP, ng/mL median (95% CI)                          | 466 (302-718)     | 233 (129-423)     | 0.15    | 0-514           |
| P-PLG activity, % mean (95% CI)                       | 110 (96-125)      | 126 (88-164)      | 0.17    | 70-130          |
| P-tPA, ng/mL median (95% CI)                          | 2(2-3)            | 4(2-5)            | 0.04    | 2-8             |
| P-uPA, ng/mL median (95% CI)                          | 0.6 (0.5-0.8)     | 0.6 (0.4-1)       | 0.40    | 1.2-2.4         |
| <b>Clot lysis assay</b>                               |                   |                   |         |                 |
| Lag time, seconds median (IQR)                        | 637 (255)         | 750 (586)         | 0.92    |                 |
| Peak absorbance, AU mean (95% CI)                     | 0.6 (0.49-0.71)   | 0.59 (0.42-0.76)  | 0.70    | 0.18-0.74       |
| 50% lysis time, seconds median (95% CI)               | 573 (427-767)     | 784 (558-1100)    | 0.21    | 309-1565        |
| Area under the curve, median (95% CI)                 | 578 (419-798)     | 695 (416-1162)    | 0.08    | 219-1051        |

B-: Blood, P-: Plasma, CI: Confidence interval, IQR: Interquartile range, INR: International normalized ratio, APTT: Activated partial thromboplastin time, PAI-1: Plasminogen activator inhibitor-1, PLG: Plasminogen, tPA: Tissue type plasminogen activator, uPA: urokinase type plasminogen activator, AUC: Area under the curve.

*Supplementary Table 4: Blood test results and fibrinolysis markers at diagnosis and follow-up for 19 patients with myeloproliferative neoplasms.*

|                                                       | At diagnosis     | At follow-up     | P-value | Reference range |
|-------------------------------------------------------|------------------|------------------|---------|-----------------|
| <b>Standard blood tests</b>                           |                  |                  |         |                 |
| B-Hemoglobin, mmol/L mean (95% CI)                    | 9.3 (8.7-9.9)    | 9.1 (8.3-9.9)    | 0.12    | 7.3-10.5        |
| B-Platelet count, 10 <sup>9</sup> /L mean (95% CI)    | 516 (406-625)    | 261 (111-412)    | 0.02    | 145-400         |
| B-Leucocyte count, 10 <sup>9</sup> /L median (95% CI) | 16.6 (10.9-25.1) | 6.2 (3.9-9.9)    | 0.07    | 3.5-10          |
| P-Creatinine, μmol/L median (95% CI)                  | 67 (56-79)       | 87 (51-149)      | 0.08    | 45-105          |
| P-C-reactive protein, mg/L median (IQR)               | 4 (0)            | 4 (0)            | 0.32    | <8              |
| <b>Coagulation tests</b>                              |                  |                  |         |                 |
| P-INR, median (IQR)                                   | 1.1 (0.2)        | 1.1 (0.1)        | 0.91    | <1.2            |
| P-APTT, seconds median (IQR)                          | 27 (2.5)         | 26 (2)           | 0.29    | 20-29           |
| P-D-dimer, mg/L median (IQR)                          | 0.53 (0.5)       | 0.44 (0.2)       | 0.29    | <0.5            |
| P-Fibrinogen, μmol/L mean (95% CI)                    | 9.3 (8.34-10.26) | 8.56 (5.72-11.4) | 0.81    | 5.5-12.0        |
| <b>Fibrinolysis markers</b>                           |                  |                  |         |                 |
| P-α2AP activity, % mean (95% CI)                      | 114 (106-122)    | 111 (82-141)     | 0.31    | 75-135          |
| P-PAI-1, ng/mL median (95% CI)                        | 12 (7-18)        | 13 (6-26)        | 0.27    | 7-43            |
| P-PAP, ng/mL median (95% CI)                          | 241 (185-313)    | 182 (127-261)    | 0.06    | 0-514           |
| P-PLG activity, % mean (95% CI)                       | 100 (94-106)     | 104 (92-117)     | 0.72    | 70-130          |
| P-tPA, ng/mL median (95% CI)                          | 3 (3-4)          | 3 (3-4)          | 0.34    | 2-8             |
| P-uPA, ng/mL median (95% CI)                          | 0.8 (0.7-1.1)    | 0.7 (0.5-1)      | 0.11    | 1.2-2.4         |
| <b>Clot lysis assay</b>                               |                  |                  |         |                 |
| Lag time, seconds median (IQR)                        | 593 (139)        | 565 (213)        | 0.75    |                 |
| Peak absorbance, AU mean (95% CI)                     | 0.65 (0.57-0.73) | 0.68 (0.53-0.84) | 0.35    | 0.18-0.74       |
| 50% lysis time, seconds median (95% CI)               | 682 (529-879)    | 694 (400-1204)   | 0.19    | 309-1565        |
| Area under the curve, median (95% CI)                 | 687 (528-894)    | 744 (545-1016)   | 0.33    | 219-1051        |

B-: Blood, P-: Plasma, CI: Confidence interval, IQR: Interquartile range, INR: International normalized ratio, APTT: Activated partial thromboplastin time, PAI-1: Plasminogen activator inhibitor-1, PLG: Plasminogen, tPA: Tissue type plasminogen activator, uPA: urokinase type plasminogen activator, AUC: Area under the curve.

*Supplementary Table 5: Regression coefficients for multiple linear regression of proteins and enzymes involved with clot formation and fibrinolysis in 79 hematological cancer patients.*

|                     |             | Dependent variables |             |         |          |          |            |          |          |
|---------------------|-------------|---------------------|-------------|---------|----------|----------|------------|----------|----------|
|                     |             | D-Dimer             | Plasminogen | PAP     | PAI-1    | A2AP     | Fibrinogen | tPA      | uPA      |
| Predictor variables | D-Dimer     |                     | 0.77        | 234 *** | -0.37    | -0.7     | 0.038      | -0.038   | 0.032 *  |
|                     | Plasminogen | 0.018               |             | 0.79    | -0.08    | 0.64 *** | 0.064 ***  | 0.051 *  | -0.0044  |
|                     | PAP         | 0.0017 ***          | 0           |         | 0.0033   | -0.0036  | 0          | 0        | 0        |
|                     | PAI-1       | -0.0052             | -0.049      | 6.24    |          | 0.11     | -0.0024    | 0.11 *** | 0        |
|                     | A2AP        | -0.011              | 0.44 ***    | -7.77   | 0.12     |          | 0.013      | -0.023   | -0.0024  |
|                     | Fibrinogen  | 0.03                | 2.2 ***     | -19.3   | -0.13    | 0.64     |            | 0.013    | 0.007    |
|                     | tPA         | -0.016              | 0.93 *      | -6.47   | 3.18 *** | -0.61    | 0.0068     |          | 0.027 ** |
|                     | uPA         | 1.29 *              | -7.74       | -315    | 2.52     | -6.15    | 0.36       | 2.57 **  |          |

PAI-1: Plasminogen activator inhibitor-1, tPA: Tissue type plasminogen activator, uPA: urokinase type plasminogen activator, α2AP: Alpha-2-antiplasmin \*: p < 0.05, \*\*: p < 0.01, \*\*\* p < 0.001

Supplementary Figure 1: Example curves of clot formation and lysis assay for different diagnosis groups in patients with hematological cancers.

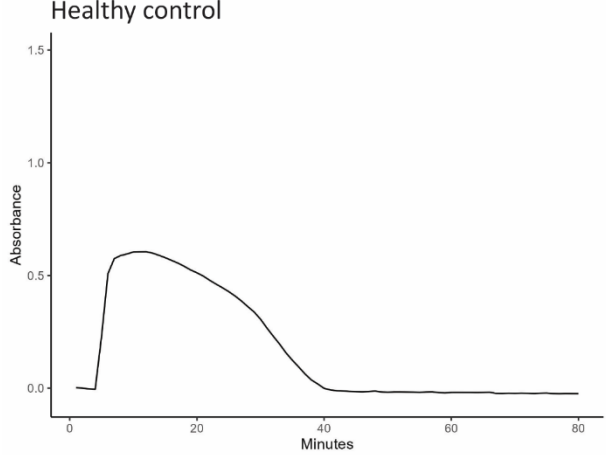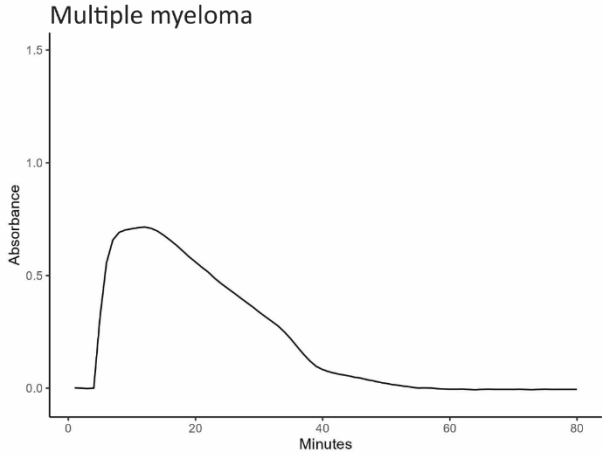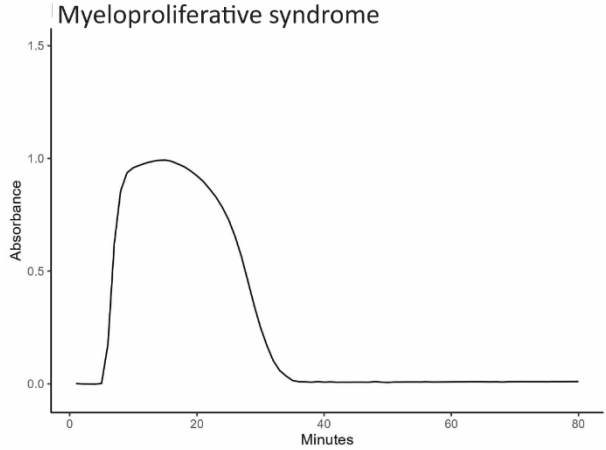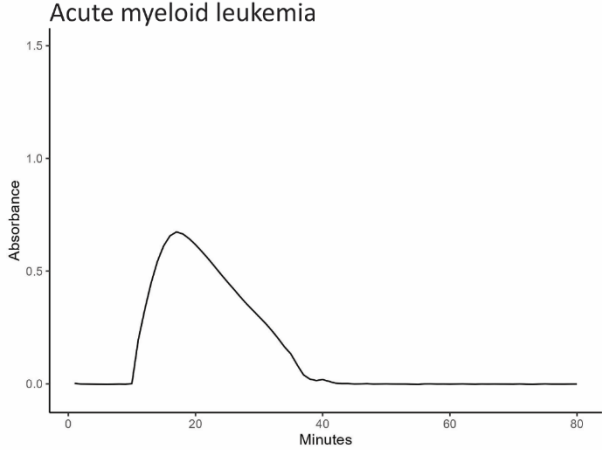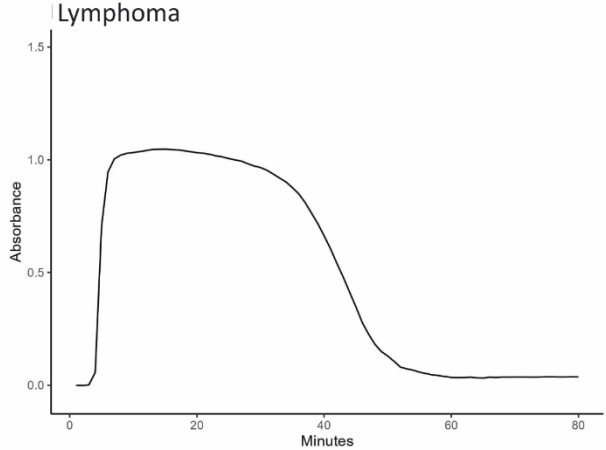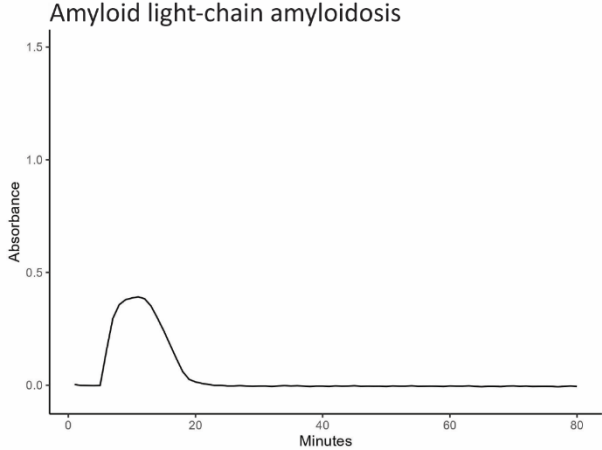

Supplement: BLOODA_ADV-2023-011379-mmc1.pdf [file BLOODA_ADV-2023-011379-mmc1.pdf]
